# Supplementary material
Source: PubMed Central journal article supplement (PMC137536)

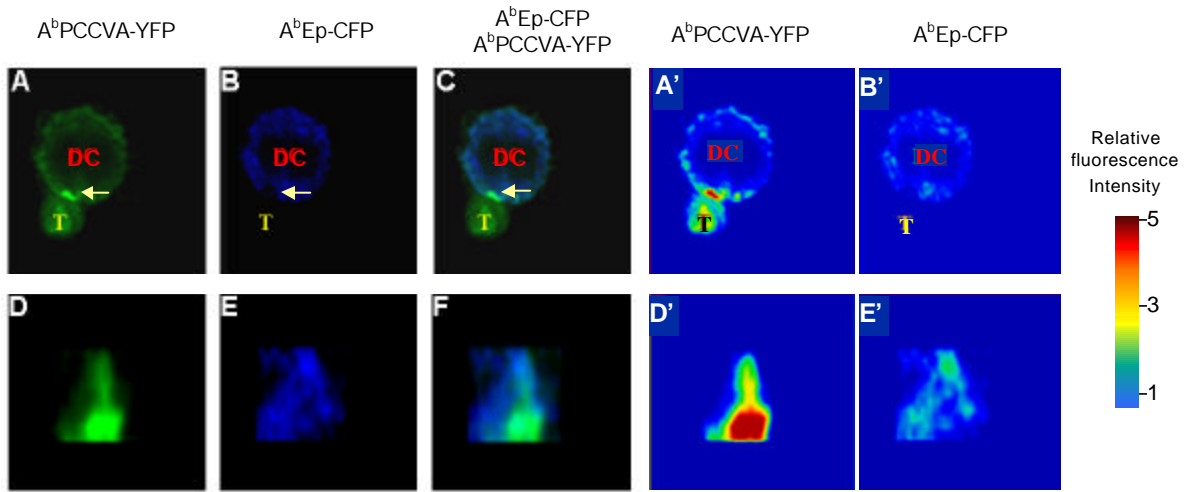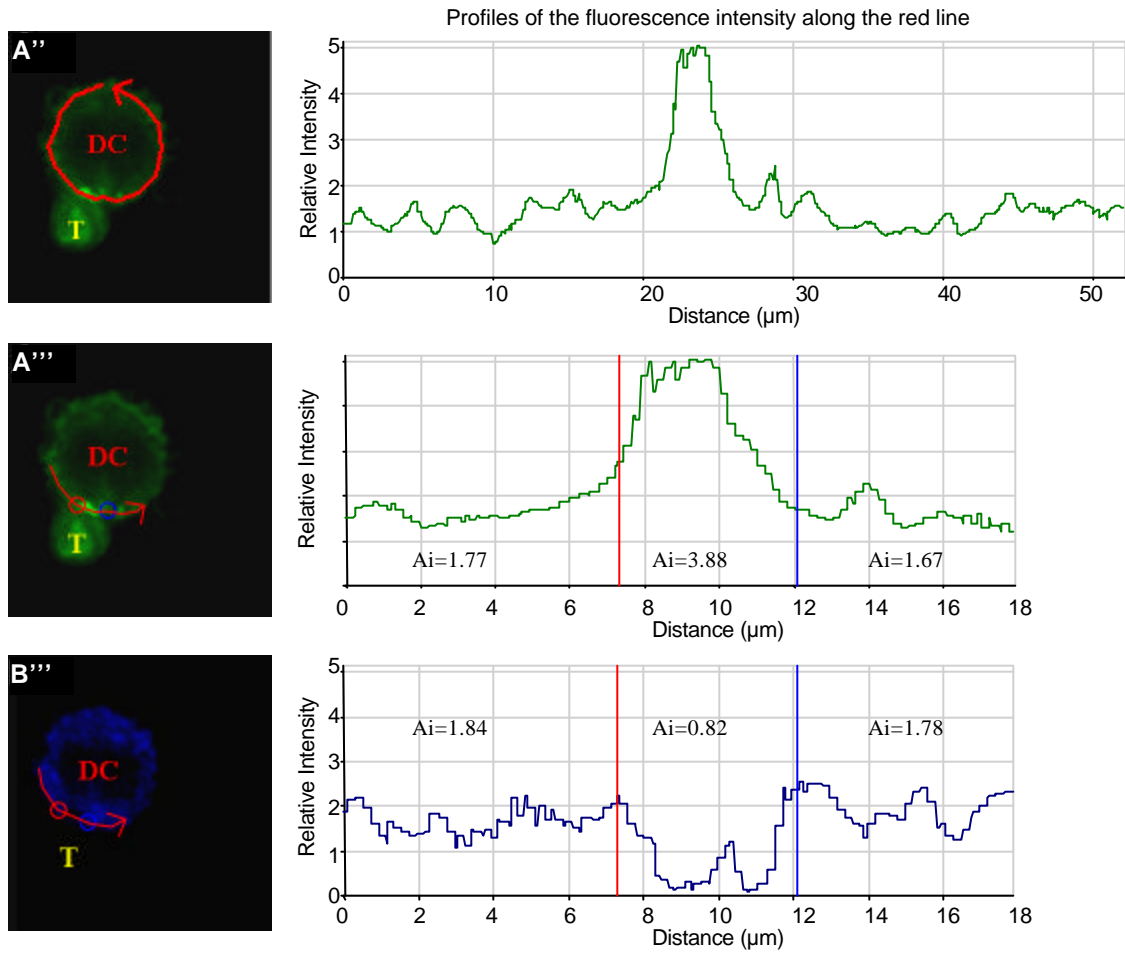

Supplement: pnas_222463499_2.pdf [file pnas_222463499_2.pdf]

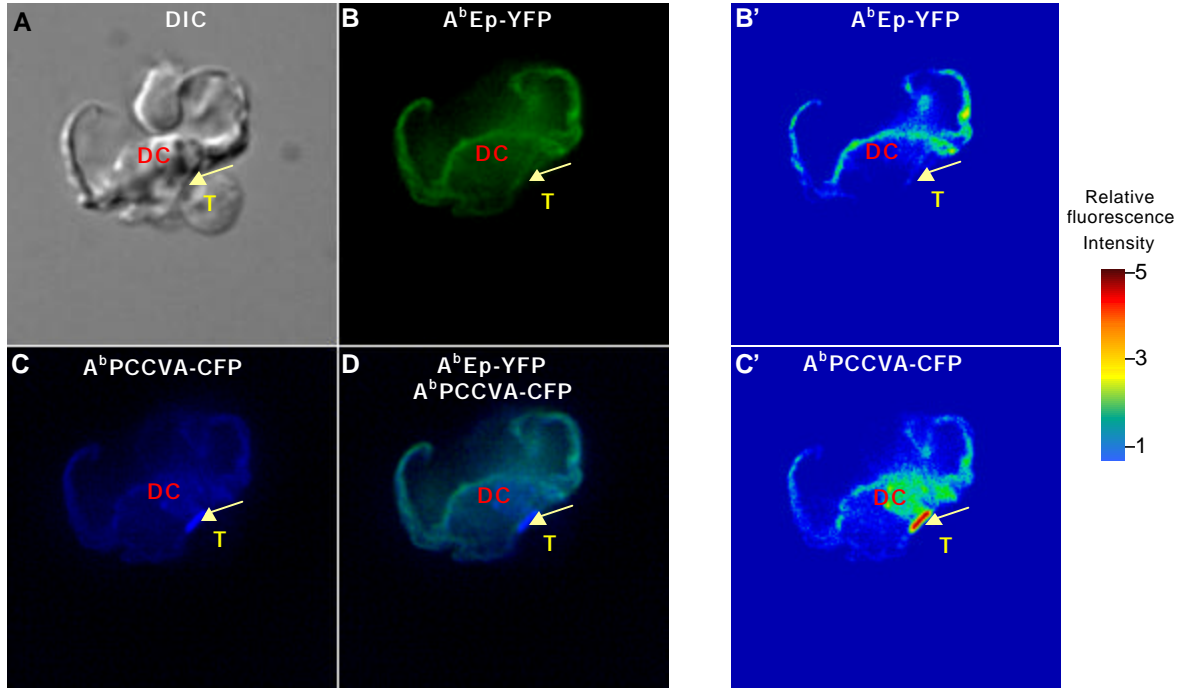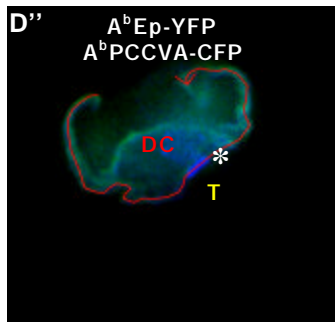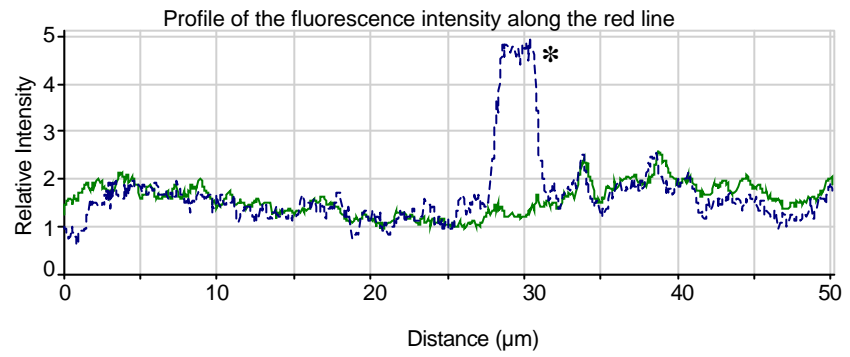

Supplement: pnas_222463499_4.pdf [file pnas_222463499_4.pdf]
